# Supplementary material
Source: publisher figshare collection journal article supplement (https://karger.figshare.com/articles/dataset/_/4028757)

Supplementary Figure 1

A

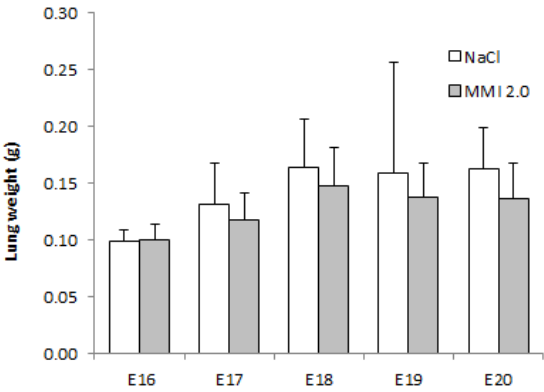

B

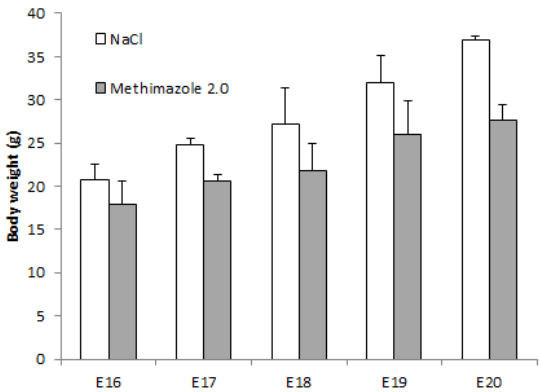

C

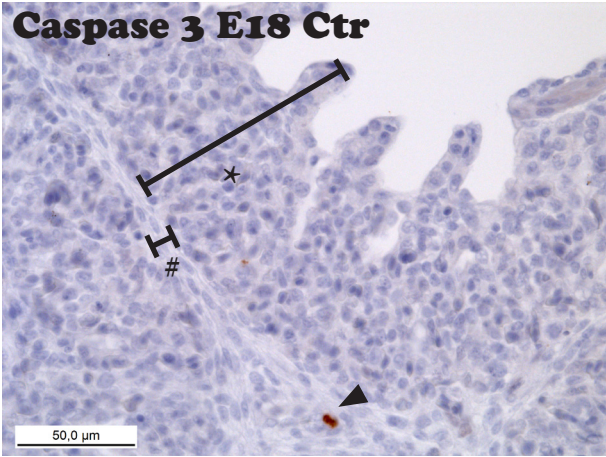

D

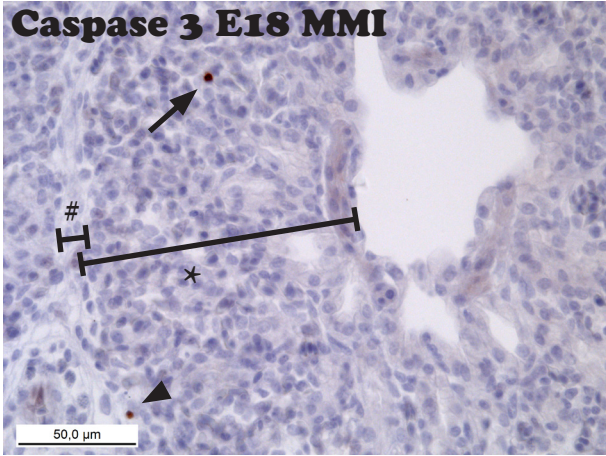

E

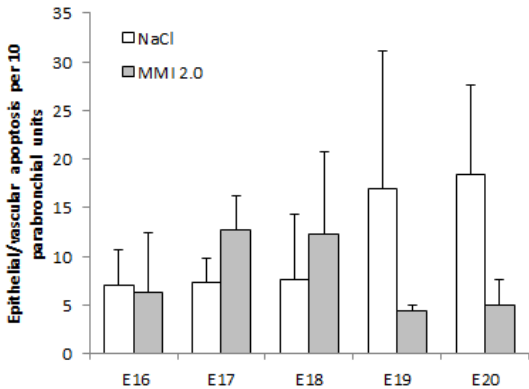

F

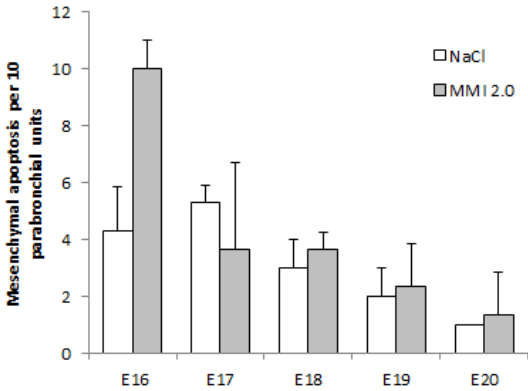

Supplement: Supplementary file 1 [file 1]
